# Supplementary material for: Two-dimensional ruthenium boride: a Dirac nodal loop quantum electrocatalyst for efficient hydrogen evolution reaction
Source: Royal Society of Chemistry journal article supplement (doi:10.1039/d2ta08951c), 2023-01-01
Supplement: d2ta08951c1.pdf [file d2ta08951c1.pdf]

## Electronic Supplementary Information

### Two-dimensional Ruthenium Boride: A Dirac Nodal Loop Quantum Electrocatalyst for Efficient Hydrogen Evolution Reaction

Zhen Gao,<sup>a</sup> Fengxian Ma,<sup>a,\*</sup> Hongbo Wu,<sup>a</sup> Yongheng Ge,<sup>b</sup> Ziming Zhu,<sup>b</sup> Ying Liu<sup>a</sup>  
Yalong Jiao,<sup>a,\*</sup> Zhongfang Chen<sup>c,\*</sup>

<sup>a</sup> College of Physics, Hebei Key Laboratory of Photophysics Research and Application, Hebei Normal University, Shijiazhuang 050024, China

<sup>b</sup> Key Laboratory of Low-Dimensional Quantum Structures and Quantum Control of Ministry of Education, Department of Physics and Synergetic Innovation Center for Quantum Effects and Applications, Hunan Normal University

<sup>c</sup> Department of Chemistry, University of Puerto Rico, Rio Piedras Campus, San Juan, PR 00931, USA.

\*E-mail:

[fengxianma@hebtu.edu.cn](mailto:fengxianma@hebtu.edu.cn);

[yalong.jiao@hebtu.edu.cn](mailto:yalong.jiao@hebtu.edu.cn);

[zhongfang.chen1@upr.edu](mailto:zhongfang.chen1@upr.edu)

## Mechanical properties

To estimate the elastic limit of the RuB<sub>4</sub> monolayer, we investigated the stress-strain relation. As shown in Fig.S1, the RuB<sub>4</sub> sheet exhibits an anisotropic elastic response under uniaxial strain, and the ultimate strength along the  $x$  direction (13.86 N/m) is larger than that along the  $y$  direction (13.25N/m). The yield point along the  $x$  direction locates at  $\epsilon_x = -5\%$ , indicating an irreversible plastic deformation when a larger compression is applied. The breaking point along  $x$  ( $\epsilon_x = 9\%$ ) is smaller than that along  $y$  ( $\epsilon_y = 17\%$ ), suggesting that the RuB<sub>4</sub> monolayer is relatively brittle along the  $x$  direction.

The curves of energy versus strain (Fig. S2) clearly show that the strain-free structure is in the equilibrium state. In elasticity theory, 2D Young's modulus along  $x$  and  $y$  directions are defined by the elastic constants as  $Y_x^{2D} = (C_{11}C_{22} - C_{12}C_{21})/C_{22}$  and  $Y_y^{2D} = (C_{11}C_{22} - C_{12}C_{21})/C_{11}$ , respectively. The evaluated  $Y_x^{2D}$  and  $Y_y^{2D}$  values for the RuB<sub>4</sub> layer are 33.5 and 207.8 GPa · nm, respectively. The value of  $Y_y^{2D}$  is about 63% of that in 2D MoS<sub>2</sub> (330 GPa · nm),<sup>1</sup> but larger than that of phosphorene (23.0 - 92.3 GPa · nm).<sup>2</sup>

To explore the lattice response of the RuB<sub>4</sub> monolayer subject to deformation, we considered the uniaxial strain  $\epsilon$  along  $x$  and  $y$  directions (Fig. S3). The values of

Poisson's ratio (PR) were calculated by the ratio of strain derivatives  $\nu = -\frac{d\epsilon_1}{d\epsilon_2}$ . As

shown in Fig. S3a and S3c, the in-plane resultant strain always decreases with increasing uniaxial strain, indicating that the in-plane PR of RuB<sub>4</sub> is positive.

Similarly, the thickness of the RuB<sub>4</sub> layer reduces under  $\epsilon_y$ , giving rise to a positive

PR (Fig. S3d). Notably, when  $+\epsilon_x$  is applied (Fig. S3b), the thickness roughly decreases before  $\epsilon_x = 2\%$ , implying a positive PR. When  $\epsilon_x$  is greater than 2%, the thickness turns to increase, resulting in a negative PR. When  $-\epsilon_x$  is applied, a sign change of PR occurs at  $\epsilon_x = -2\%$ . Note that a large PR value of -0.3 is estimated at  $\epsilon_x = 3\%$ , greater than many reported monolayers, such as black phosphorus (-0.027)<sup>3</sup>, silicon dioxides (-0.022 to -0.123)<sup>4</sup>, Be<sub>5</sub>C<sub>2</sub> (-0.041 to -0.16)<sup>5</sup> and borophane (-0.053)<sup>6</sup>.

To understand the origin of negative PR in the RuB<sub>4</sub> sheet, we examined the evolutions of some key geometric parameters under different strains (Fig. S4). As shown in Fig. S4a, the unit cell of the sheet is comprised of two boron chains linked by transition metal atoms (Ru). The lattice constants ( $l_x$  and  $l_y$ ) and the layer thickness  $d$  are determined by:  $l_x = l_1 + l_2$ ,  $l_y = 4b_1 \sin(\frac{\theta_1}{2})$ , and  $d = b_2 \sin \theta_2$ , respectively. Here,  $b_2$  is a B-B atom distance, and  $\theta_2$  is a dihedral angle (Fig. S4a, S4b). The thickness  $d$  is strongly related to the variation of  $\theta_2$  and  $b_2$ . Note that  $l_1$  and  $l_2$  can be expressed by bond lengths and angles as well. The detailed analysis is given in Fig. S5.

Briefly, when  $+\epsilon_x$  is applied (Fig. S4c),  $b_2$  decreases linearly with the increasing  $\epsilon_x$ , while  $\theta_2$  gradually rises. The resultant  $d$  is slightly fluctuated, which is mainly attributed to the competition between  $b_2$  and  $\theta_2$ . Overall, the change of  $\theta_2$  ( $\Delta\theta_2$ ) is larger than that of  $b_2$ . Therefore,  $\Delta\theta_2$  is the dominant factor for the lattice response. An inflection point for  $d$  appears at  $\epsilon_x = 2\%$ , where the  $\Delta\theta_2$  slows down and  $\Delta b_2$  overwhelms  $\Delta\theta_2$ . When  $-\epsilon_x$  is applied, the change of  $\theta_2$  is slow when  $\epsilon_x > -2\%$ , but accelerates as  $\epsilon_x < -2\%$ , leading to a positive PR to negative PR transition at -2%.

When  $\varepsilon_y$  is applied (Fig. S4e), the angle  $\theta_2$  decreases with the increase of  $\varepsilon_y$ , while the distance  $b_5$  remains almost unchanged. Therefore, the thickness  $d$  follows the decreasing trend of  $\theta_2$ , and the PR is positive.

In short, the negative PR in the RuB<sub>4</sub> sheet is attributed to the competition between specific bond lengths and angles.

### The Pourbaix diagram

The surface Pourbaix diagram for RuB<sub>4</sub> is constructed by plotting the most stable surface state under the relevant  $U_{SHE}$  and pH values. In our model, we assume that the oxidation of water to OH\* and O\* on RuB<sub>4</sub> lattice occur through the following steps:

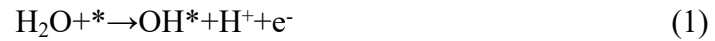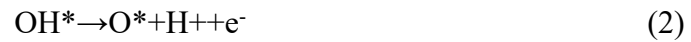

Under standard conditions, the free energy of  $H^++e^-$  is equal to  $1/2 H_2$ . Therefore, the above equations can be rewritten as:

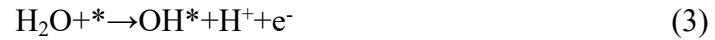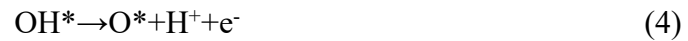

The Gibbs free energies for reactions (3) and (4) are defined as  $\Delta G_1^0$  and  $\Delta G_2^0$ , respectively, and they are obtained by :

$$\Delta G^0 = \Delta E + \Delta E_{ZPE} - T\Delta S \quad (5)$$

where  $\Delta E$  is the energy difference from reactions (3) and (4). The values from  $E_{ZPE} - T\Delta S$  are calculated based on the values from ref. 7.

To include the effects of pH and potential  $U$ , we rewrite equation (5) as equations (6) and (7):

$$\Delta G_1 = \Delta G_1^0 - eU_{SHE} - k_b T \ln 10 \times pH \quad (6)$$

$$\Delta G_2 = \Delta G_2^0 - eU_{SHE} - k_b T \ln 10 \times pH \quad (7)$$

The free energy change of OH\* and O\* termination in Pourbaix diagram can be obtained as follows:

$$\Delta G_{OH^*} = \Delta G_1 \quad (8)$$

$$\Delta G_{O^*} = \Delta G_1 + \Delta G_2 \quad (9)$$

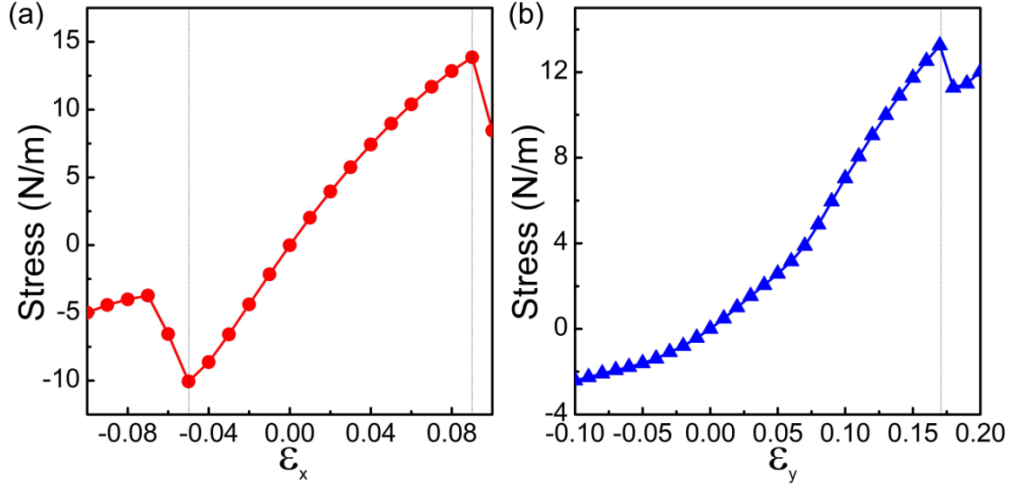

**Figure S1.** (a-b) Stress-strain curves for the RuB<sub>4</sub> monolayer along x and y directions.

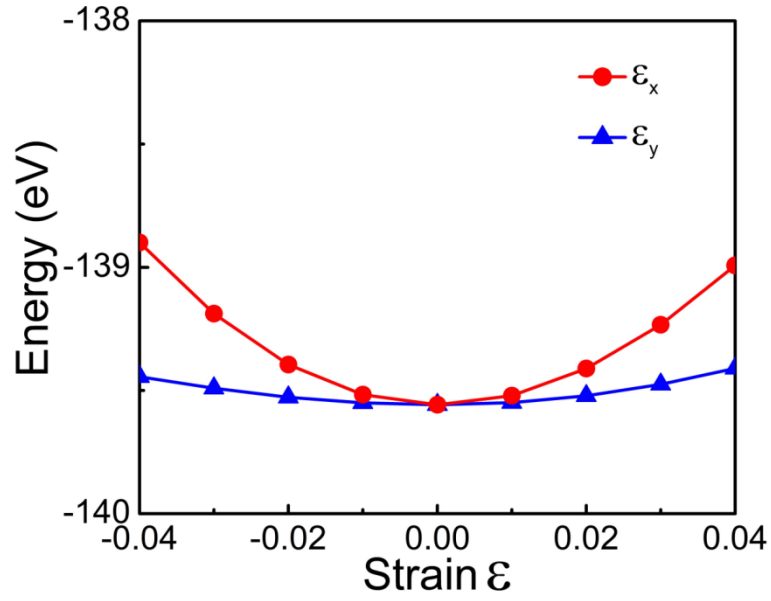

**Figure S2.** Energy-strain curves of the RuB<sub>4</sub> monolayer.

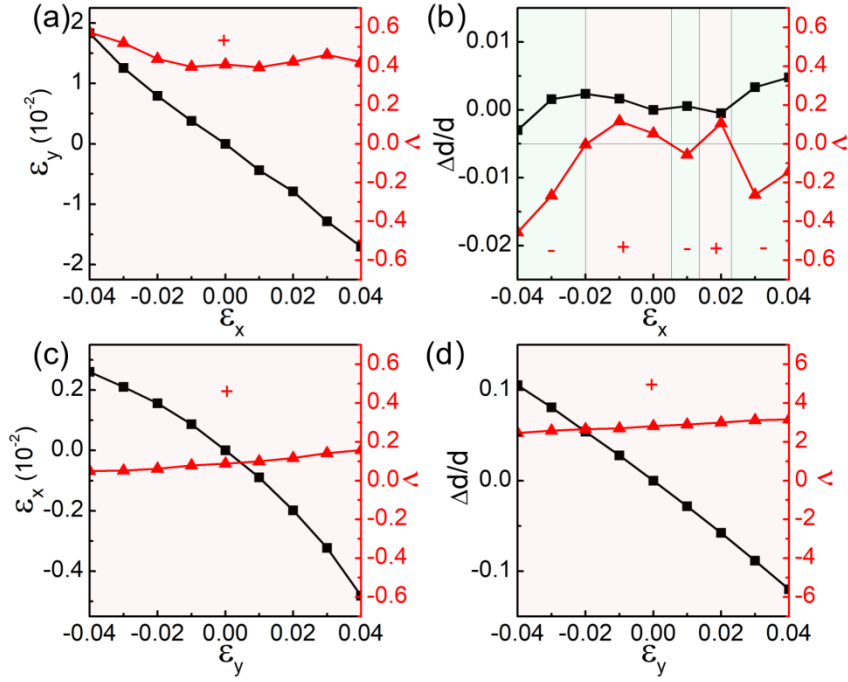

**Figure S3.** Mechanical response of the RuB<sub>4</sub> monolayer under the uniaxial strain along (a-b)  $x$  and (c-d)  $y$  directions. The light pink and blue region denote the Poisson's ratios (PR) with positive (+) and negative values (-).

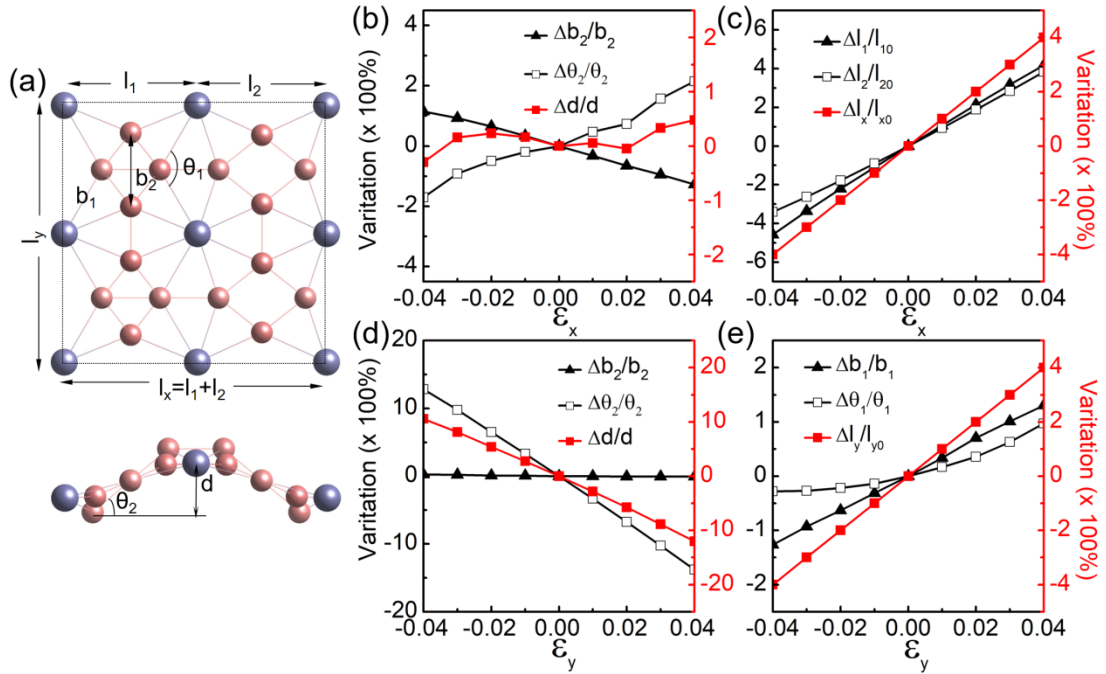

**Figure S4.** (a) Top and side views of the RuB<sub>4</sub> unit cell. The thickness  $d$  is governed by the dihedral angle  $\theta_2$  and the distance between the specific B atoms ( $b_2$ ). (c-d) The evolution of the structural parameters ( $b_2$ ,  $\theta_2$ ,  $d$ ) of the RuB<sub>4</sub> monolayer under strains

along  $x$  direction. The thickness  $d$  was obtained through the equation  $d = b_2 \sin \theta_2$ . (d-

e) The variation of the structural parameters ( $b_2$ ,  $\theta_2$ ,  $d$ ) of the RuB<sub>4</sub> monolayer under strains along  $y$  direction. The lattice vector lengths  $l_x$  and  $l_y$  were obtained through

$$l_x = l_1 + l_2 \text{ and } l_y = 4b_1 \sin\left(\frac{\theta_1}{2}\right), \text{ respectively.}$$

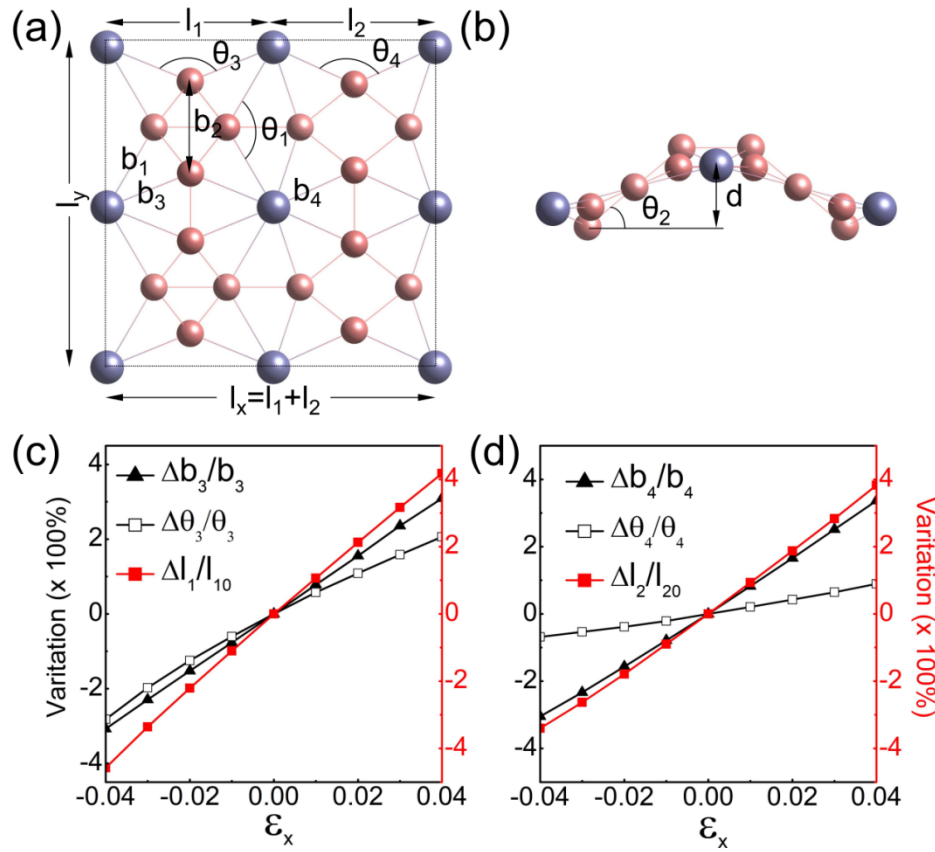

**Figure S5.** (a-b) Top and side views of the RuB<sub>4</sub> monolayer. Two lattice vectors in the rectangular cell are directly related to the distance between Ru atoms. (c-d) Dependence of the bonding parameters  $b_3$ ,  $b_4$ ,  $\theta_3$ , and  $\theta_4$  on the strain along  $x$  and  $y$  directions ( $\epsilon_x$  and  $\epsilon_y$ ) of The length  $l_1$ , and  $l_2$  were obtained through equation

$$l_1 = 2b_3 \sin\left(\frac{\theta_3}{2}\right), \text{ and } l_2 = 2b_4 \sin\left(\frac{\theta_4}{2}\right), \text{ respectively.}$$

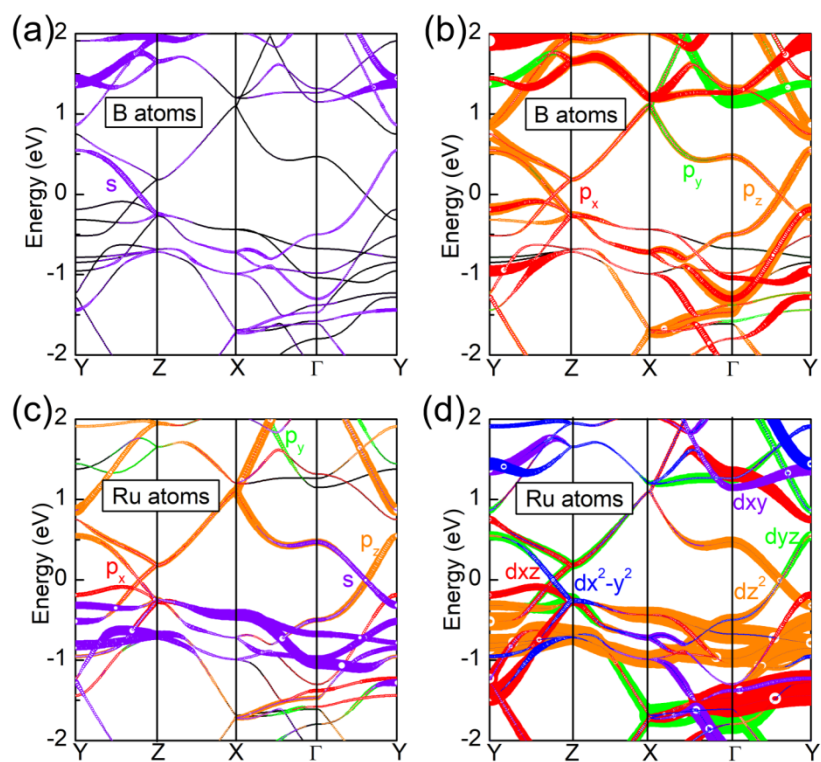

**Figure S6.** Orbital-resolved band structures for the RuB<sub>4</sub> monolayer.

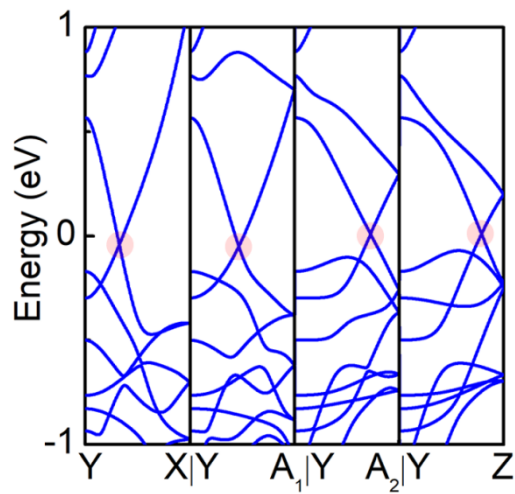

**Figure S7.** Band structure of the RuB<sub>4</sub> monolayer along selected band paths illustrated in Figure 3c.

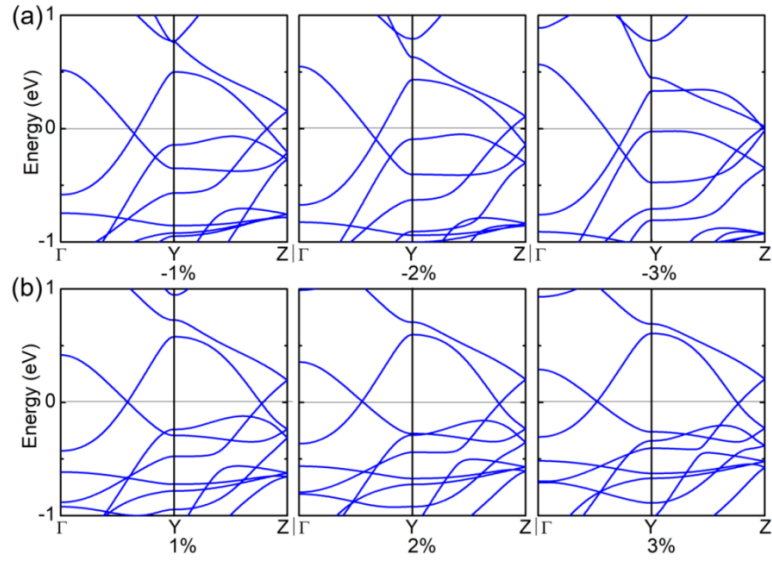

**Figure S8.** Band structure of the  $\text{RuB}_4$  monolayer under (a) compressive and (b) tensile biaxial strains. The Fermi level was set to zero.

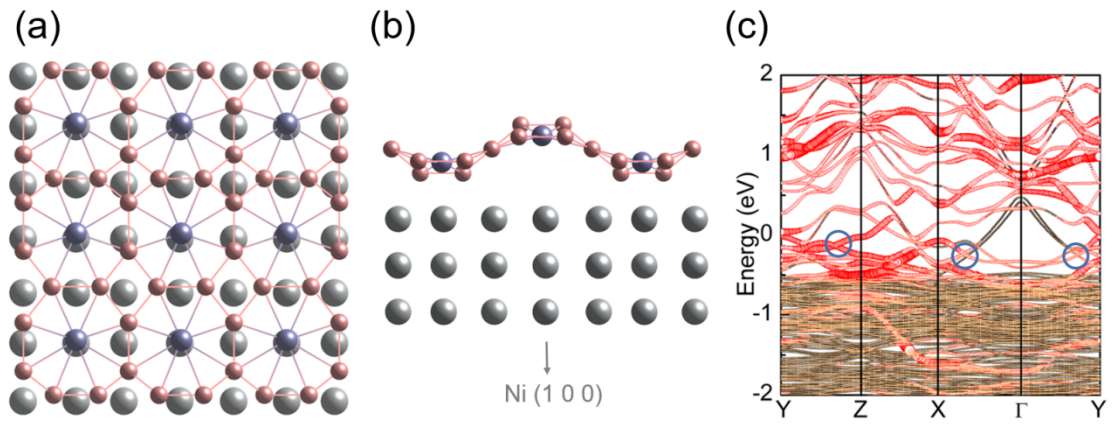

**Figure S9.** (a-b) Top and side view of the  $\text{RuB}_4+\text{Ni}$  (1 0 0) system. (c) The corresponding band structure (spin up channel) for  $\text{RuB}_4+\text{Ni}$  (1 0 0) system. Red and orange lines indicate the band contribution from  $\text{RuB}_4$  and Ni element, respectively.

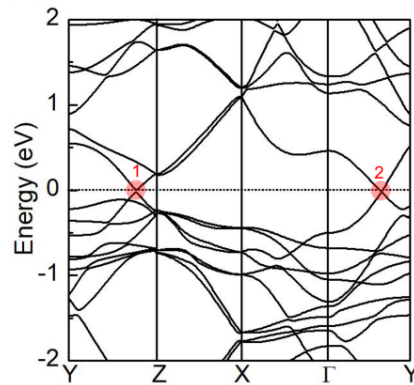

**Figure S10.** Band structure of the  $\text{RuB}_4$  monolayer by the PBE+U+SOC method.

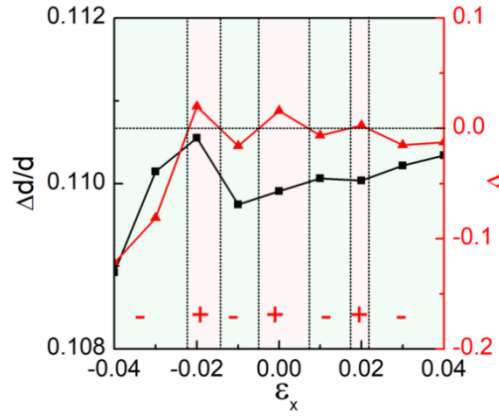

**Figure S11.** Mechanical response of hydrogen adsorbed RuB<sub>4</sub> monolayer under uniaxial strain  $x$ . The light pink and blue region denote the Poisson's ratios (PR) with positive (+) and negative values (-).

In **Figure S11**, we further found that hydrogen adsorption does not bring any significant effect on the mechanical response under strain effects, thus the auxetic property of the RuB<sub>4</sub> monolayer can be preserved upon hydrogen adsorption.

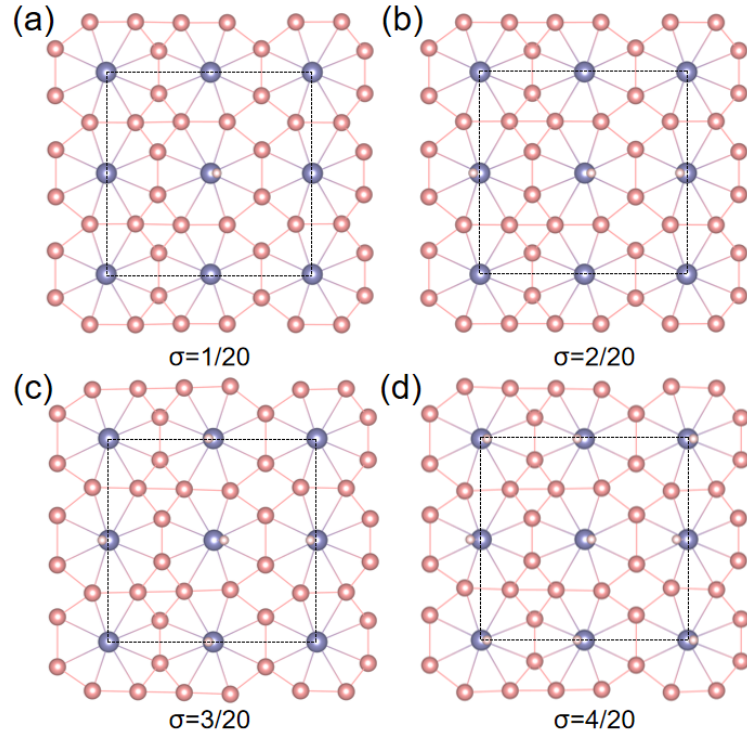

**Figure S12.** Illustration of stable adsorption states with different hydrogen coverage.

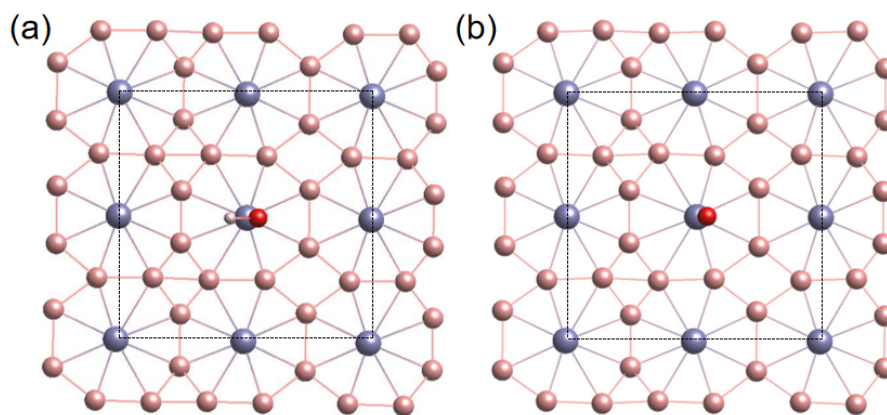

**Figure S13.** Structural configurations of (a) OH and (b) O adsorbed RuB<sub>4</sub> sheets.

**Table S1.** The elastic constants (in GPa•nm) for the RuB<sub>4</sub> monolayer.

| $C_{11}$ | $C_{22}$ | $C_{66}$ | $C_{12}$ |
|----------|----------|----------|----------|
| 34.52    | 214.1    | 82.98    | 14.79    |

## References

1. A. Castellanos-Gomez, M. Poot, G. A. Steele, H. S. J. van der Zant, N. Agrait and G. Rubio-Bollinger, *Adv. Mater.*, 2012, **24**, 772-775.
2. L. Wang, A. Kutana, X. Zou and B. I. Yakobson, *Nanoscale*, 2015, **7**, 9746-9751.
3. J.-W. Jiang and H. S. Park, *Nat. Commun.*, 2014, **5**, 4727.
4. Z. Gao, X. Dong, N. Li and J. Ren, *Nano Lett.*, 2017, **17**, 772-777.
5. Y. Wang, F. Li, Y. Li and Z. Chen, *Nat. Commun.*, 2016, **7**, 11488.
6. L. Kou, Y. Ma, C. Tang, Z. Sun, A. Du and C. Chen, *Nano Lett.*, 2016, **16**, 7910-7914.
7. Á. Valdés, Z. W. Qu, G. J. Kroes, J. Rossmeisl and J. K. Nørskov, *The Journal of Physical Chemistry C*, 2008, **112**, 9872-9879.
